# Supplementary material for: Selective fluorination of perovskite iron oxide/ruthenium oxide heterostructures via a topotactic reaction
Source: Royal Society of Chemistry journal article supplement (doi:10.1039/c8cc09443h), 2019-01-01
Supplement: c8cc09443h1.pdf [file c8cc09443h1.pdf]

## Electronic Supplementary Information

# Selective fluorination of perovskite iron oxide/ruthenium oxide heterostructures via a topotactic reaction

Akira Chikamatsu,<sup>\*a</sup> Yusuke Suzuki,<sup>a</sup> Takahiro Maruyama,<sup>a</sup> Tomoya Onozuka,<sup>a</sup> Tsukasa Katayama,<sup>a</sup>  
Daisuke Ogawa,<sup>b</sup> and Tetsuya Hasegawa<sup>a</sup>

<sup>a</sup>*Department of Chemistry, The University of Tokyo, 7-3-1 Hongo, Bunkyo-ku, Tokyo 113-0033, Japan*

<sup>b</sup>*Tokyo Metropolitan Industrial Technology Research Institute (TIRI), 2-4-10 Aomi, Koto-ku, Tokyo  
135-0064, Japan*

\*E-mail: [chikamatsu@chem.s.u-tokyo.ac.jp](mailto:chikamatsu@chem.s.u-tokyo.ac.jp)

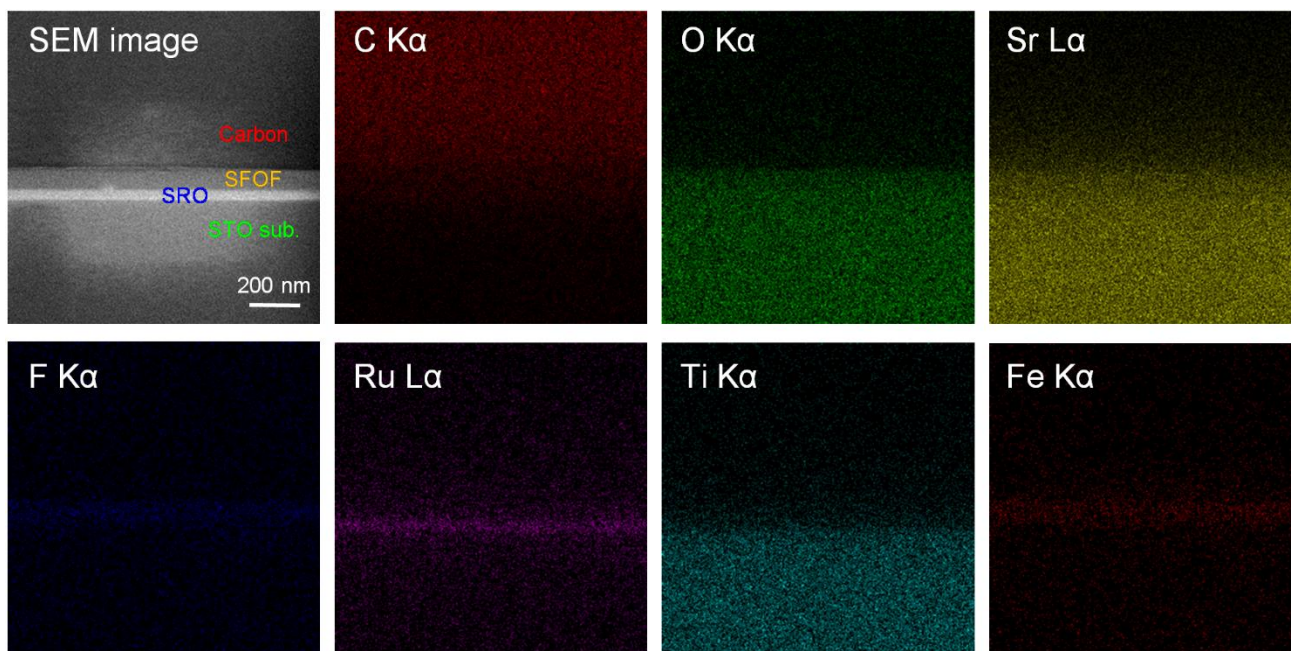

**Figure S1.** Cross-sectional SEM image of the SFOF (~70 nm)/SRO (~40 nm) bilayer film and corresponding EDX maps for C, O, Sr, F, Ru, Ti, and Fe. The electron-accelerating voltage was set to 10 keV.

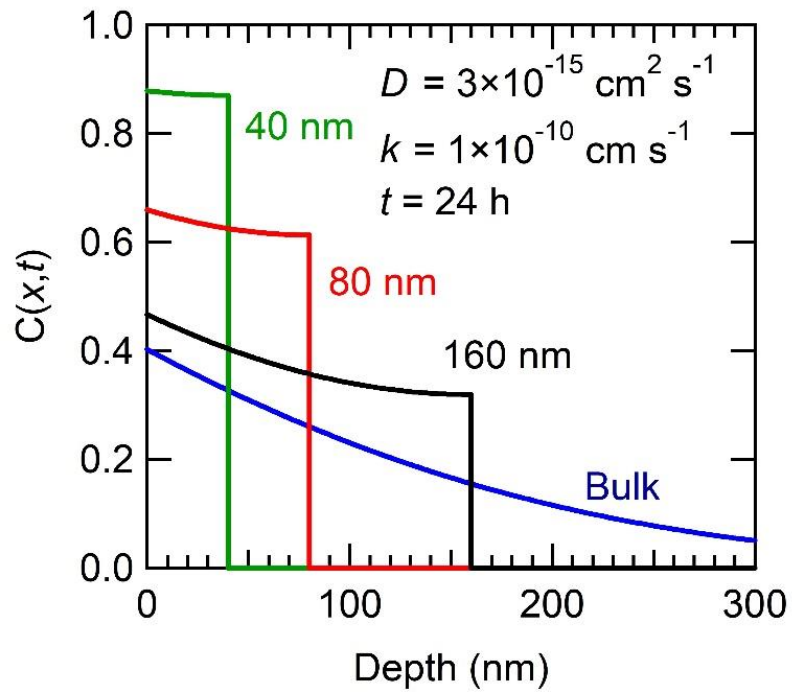

**Figure S2.** Depth dependence simulation of  $C(x)$  for thin films with  $l = 40, 80, 160 \text{ nm}$ , and for a bulk sample with  $l \rightarrow \infty$  at  $t = 24 \text{ h}$ , where  $D$  and  $k$  were assumed to  $3 \times 10^{-15} \text{ cm}^2 \text{ s}^{-1}$  and  $1 \times 10^{-10} \text{ cm}^2 \text{ s}^{-1}$ , respectively.
